# Supplementary material
Source: Frontiers journal article supplement (https://www.frontiersin.org/articles/224187)
Supplement: Data_Sheet_1.pdf [file Data_Sheet_1.pdf]

## Supplementary Material

# Lower sensitivity to happy and angry facial emotions in young adults with psychiatric problems

C. Vrijen\*, C.A. Hartman, G.M.A. Lodder, M. Verhagen, P. de Jonge, A.J. Oldehinkel

\* Corresponding Author: c.vrijen@umcg.nl

## 1 Multiple test correction method: False Discovery Rate combined with Effective number of tests

To correct for multiple tests, the effective number of tests (Meff) (Li and Ji, 2005) was calculated and used as input for the classical False Discovery Rate (FDR) method (Benjamini and Hochberg, 1995). The Meff and the FDR method were both developed as instruments to correct for multiple testing while remaining sufficient power, but they are based on different principles. The main idea behind the Meff method is that the effective number of tests can be determined by means of the correlations between tested variables. If correlations are higher, the number of effective tests decreases and correcting for the total rather than the effective number of tests is too conservative and results in unwarranted loss of power. Characteristic of the FDR method is that power decreases when the number of significant results decreases. The main thought behind this approach is that finding one significant result in 20 tests calls for a more stringent correction than finding 10 significant results in 20 tests. The advantage in power of FDR above more conservative methods increases when more significant results are found and when the total number of tests increases. Combining the Meff and the FDR method, as suggested by a.o. Li and Ji (2005), seemed appropriate for our study since we expected high correlations between our dependent variables, moderate correlations between our independent variables, and based on previous findings we also expected to find multiple significant results.

### 1.1 Meff backgrounds and calculation method

The Li and Ji Meff is an adaptation of the Cheverud method (Cheverud, 2001). Li and Ji claim that Cheverud's Meff is still too conservative and is only appropriate for two extreme cases, i.e. cases of high correlations between tested variables and cases with hardly any correlations between tested variables, and not for studies with many tests and moderate correlations between tested variables. According to Li and Ji their method gives a more accurate estimate of the Meff that works in the extreme cases as well as in the continuum between these extremes. Especially in the continuum Cheverud's Meff is claimed to be overly large and in this area the Li and Ji Meff would result in more power.

Although the Meff is often calculated only for dependent variables, since we aimed at correcting for the number of independent variables as well, we calculated separate Meffs for the dependent and the independent variables and then multiplied them to establish the total number of effective tests. First, the correlation matrix of our six dependent variables was used to calculate eigenvalues for each of these variables, by using the application offered on [www.junningli.org](http://www.junningli.org). Subsequently, the following equation, as proposed by Li and Ji (2005), was applied to the eigenvalues:

$$\left\{ \begin{array}{l} \text{Meff} = \sum_{i=1}^M f(|\lambda_i|) \\ f(x) = I(x \geq 1) + (x - [x]), x \geq 0 \end{array} \right.$$

Eigenvalues are decomposed into an **integral part**, with  $I(x \geq 1)$  representing what should be counted as 1 test, and a *nonintegral* part  $x - [x]$ , representing what counts as a partial test.

The Meff was first calculated for the dependent variables. This resulted in a Meff<sub>dependent</sub> score of 4 (see Table S-1).

Table S-1

*Correlation matrix dependent variables, eigenvalues and Meff<sub>dependent</sub>*

|                           | Correlations |         |           |       |            |             | Eigenvalues   | Meff            |
|---------------------------|--------------|---------|-----------|-------|------------|-------------|---------------|-----------------|
|                           | Depressive   | Anxiety | Avoidance | ADHD  | Antisocial | Total prob. |               |                 |
| Depressive                | 1.000        | 0.694   | 0.635     | 0.521 | 0.407      | 0.882       | <b>3.8675</b> | 1.8675          |
| Anxiety                   | 0.694        | 1.000   | 0.573     | 0.405 | 0.311      | 0.837       | <b>0.9350</b> | 0.9350          |
| Avoidance                 | 0.635        | 0.573   | 1.000     | 0.281 | 0.284      | 0.784       | <b>0.5357</b> | 0.5357          |
| ADHD                      | 0.521        | 0.405   | 0.281     | 1.000 | 0.495      | 0.689       | <b>0.3959</b> | 0.3959          |
| Antisocial                | 0.407        | 0.311   | 0.284     | 0.495 | 1.000      | 0.539       | <b>0.2694</b> | 0.2694          |
| Total prob.               | 0.882        | 0.837   | 0.784     | 0.680 | 0.539      | 1.000       | <b>0.0000</b> | <u>0.0000 +</u> |
| Meff <sub>dependent</sub> |              |         |           |       |            |             | <b>4.0035</b> |                 |

The same procedure was followed for the four independent variables, resulting in a Meff<sub>independent</sub> score of 3 (see Table S-2).

Table S-2

*Correlation matrix independent variables, eigenvalues and Meff<sub>independent</sub>*

|                             | Correlations |        |          |         | Eigenvalues   | Meff           |
|-----------------------------|--------------|--------|----------|---------|---------------|----------------|
|                             | RT Happy     | RT Sad | RT Angry | RT Fear |               |                |
| RT Happy                    | 1.000        | 0.469  | 0.480    | 0.459   | <b>2.5384</b> | 1.5384         |
| RT Sad                      | 0.469        | 1.000  | 0.557    | 0.576   | <b>0.5738</b> | 0.5738         |
| RT Angry                    | 0.480        | 0.557  | 1.000    | 0.530   | <b>0.4691</b> | 0.4691         |
| RT Fear                     | 0.459        | 0.576  | 0.530    | 1.000   | <b>0.4187</b> | <u>0.4187+</u> |
| Meff <sub>independent</sub> |              |        |          |         | <b>3.000</b>  |                |

Multiplying Meff<sub>dependent</sub> and Meff<sub>independent</sub> resulted in a total of 12 effective tests. Because for all problem domains we analyzed all emotions separately as well as in full emotion models and therefore tested all of them twice, we multiplied the effective number of tests by 2 and used a Meff score of 24 as input for the FDR method.

## 1.2 FDR backgrounds and calculations (Table S-3)

For the calculation of the classical FDR (Benjamini and Hochberg, 1995), first the p-values of all performed statistical tests are ranked from low to high. Subsequently, with alpha set to 0.05, for each found result an FDR corrected significance threshold is calculated:

$$FDR \text{ derived significance threshold} = \frac{0.05}{\text{number of tests}_{/ \text{ranking}}}$$

When these are calculated, it is determined which of the original p-value is still smaller than the FDR corrected significance threshold. Each result with that ranking or higher is still considered significant after multiple testing. We combined FDR and Meff and therefore replaced the number of tests by the Meff-value:

$$FDR \text{ derived significance threshold} = \frac{0.05}{\text{Meff}_{/ \text{ranking}}}$$

As can be seen in the table below, for the hypothesis with the 9<sup>th</sup> p-value ranking the p-value is still below the FDR-derived significance threshold, but this is no longer the case for the 10<sup>th</sup> p-value. The FDR-derived significance thresholds for rank 9 can be calculated as follows:

$$\frac{0.05}{24/9} = 0.01875$$

Since the 9<sup>th</sup> p-value is the last one to remain below the FDR-derived significance threshold, this significance threshold (0.01875) is the threshold for all tests.

Table S-3

*Effective number of tests ( $M_{eff} = 24$ ) applied to FDR classical method, with alpha set to 0.05*

| Hypothesis name     | <i>p</i> -value | Rank | Ascending<br><i>p</i> -values | Hypothesis name     | FDR-<br>derived<br>significance<br>thresholds | FDR-<br>adjusted<br><i>p</i> -values |
|---------------------|-----------------|------|-------------------------------|---------------------|-----------------------------------------------|--------------------------------------|
| Happy depres        | 0.061           | 1    | 0.005                         | Angry adhd*         | 0.002083                                      | 0.030857                             |
| Sad depres          | 0.993           | 2    | 0.005                         | Angry avoi*         | 0.004167                                      | 0.030857                             |
| Angry depres        | 0.055           | 3    | 0.006                         | Angry total*        | 0.006250                                      | 0.030857                             |
| Fear depres         | 0.312           | 4    | 0.007                         | Happy total*        | 0.008333                                      | 0.030857                             |
| Happy anx           | 0.144           | 5    | 0.007                         | Happy antisoc*      | 0.010417                                      | 0.030857                             |
| Sad anx             | 0.977           | 6    | 0.008                         | Angry adhd multi*   | 0.012500                                      | 0.030857                             |
| Angry anx           | 0.188           | 7    | 0.009                         | Happy avoi*         | 0.014583                                      | 0.030857                             |
| Fear anx            | 0.541           | 8    | 0.012                         | Angry avoi multi*   | 0.016667                                      | 0.034667                             |
| Happy avoi          | 0.009           | 9    | 0.013                         | Angry total multi*  | 0.018750                                      | 0.034667                             |
| Sad avoi            | 0.582           | 10   | 0.035                         | Happy adhd          | 0.020833                                      | 0.084000                             |
| Angry avoi          | 0.005           | 11   | 0.045                         | Happy total multi   | 0.022917                                      | 0.090000                             |
| Fear avoi           | 0.516           | 12   | 0.045                         | Happy antisoc multi | 0.025000                                      | 0.090000                             |
| Happy adhd          | 0.035           | 13   | 0.055                         | Angry depres        | 0.027083                                      | 0.091500                             |
| Sad adhd            | 0.797           | 14   | 0.060                         | Happy avoi multi    | 0.029167                                      | 0.091500                             |
| Angry adhd          | 0.005           | 15   | 0.061                         | Angry antisoc       | 0.031250                                      | 0.091500                             |
| Fear adhd           | 0.153           | 16   | 0.061                         | Happy depress       | 0.033333                                      | 0.091500                             |
| Happy antisoc       | 0.007           | 17   | 0.074                         | Angry depres multi  | 0.035417                                      | 0.104471                             |
| Sad antisoc         | 0.405           | 18   | 0.087                         | Sad total multi     | 0.037500                                      | 0.116000                             |
| Angry antisoc       | 0.061           | 19   | 0.102                         | Sad depres multi    | 0.039583                                      | 0.128842                             |
| Fear antisoc        | 0.145           | 20   | 0.117                         | Sad avoi multi      | 0.041667                                      | 0.140400                             |
| Happy total         | 0.007           | 21   | 0.144                         | Happy anx           | 0.043750                                      | 0.141231                             |
| Sad total           | 0.725           | 22   | 0.145                         | Fear antisoc        | 0.045833                                      | 0.141231                             |
| Angry total         | 0.006           | 23   | 0.149                         | Sad adhd multi      | 0.047917                                      | 0.141231                             |
| Fear total          | 0.241           | 24   | 0.150                         | Happy adhd multi    | 0.050000                                      | 0.141231                             |
| Happy depres multi  | 0.153           | 25   | 0.153                         | Happy depres multi  | 0.052083                                      | 0.141231                             |
| Sad depres multi    | 0.102           | 26   | 0.153                         | Fear adhd           | 0.054167                                      | 0.141231                             |
| Angry depres multi  | 0.074           | 27   | 0.181                         | Angry anx multi     | 0.056250                                      | 0.160889                             |
| Fear depres multi   | 0.887           | 28   | 0.188                         | Angry anx           | 0.058333                                      | 0.161143                             |
| Happy anx multi     | 0.225           | 29   | 0.225                         | Happy anx multi     | 0.060417                                      | 0.186207                             |
| Sad anx multi       | 0.343           | 30   | 0.241                         | Fear total          | 0.062500                                      | 0.192800                             |
| Angry anx multi     | 0.181           | 31   | 0.298                         | Angry antisoc multi | 0.064583                                      | 0.230710                             |
| Fear anx multi      | 0.883           | 32   | 0.312                         | Fear depress        | 0.066667                                      | 0.234000                             |
| Happy avoi multi    | 0.060           | 33   | 0.343                         | Sad anx multi       | 0.068750                                      | 0.249455                             |
| Sad avoi multi      | 0.117           | 34   | 0.380                         | Sad antisoc multi   | 0.070833                                      | 0.268235                             |
| Angry avoi multi    | 0.012           | 35   | 0.405                         | Sad antisoc         | 0.072917                                      | 0.277714                             |
| Fear avoi multi     | 0.653           | 36   | 0.516                         | Fear avoi           | 0.075000                                      | 0.344000                             |
| Happy adhd multi    | 0.150           | 37   | 0.541                         | Fear anx            | 0.077083                                      | 0.350919                             |
| Sad adhd multi      | 0.149           | 38   | 0.582                         | Sad avoi            | 0.079167                                      | 0.367579                             |
| Angry adhd multi    | 0.008           | 39   | 0.653                         | Fear avoi multi     | 0.081250                                      | 0.401846                             |
| Fear adhd multi     | 0.834           | 40   | 0.725                         | Sad total           | 0.083333                                      | 0.435000                             |
| Happy antisoc multi | 0.045           | 41   | 0.797                         | Sad adhd            | 0.085417                                      | 0.466537                             |
| Sad antisoc multi   | 0.380           | 42   | 0.834                         | Fear adhd multi     | 0.087500                                      | 0.471070                             |
| Angry antisoc multi | 0.298           | 43   | 0.844                         | Fear total multi    | 0.089583                                      | 0.471070                             |
| Fear antisoc multi  | 0.934           | 44   | 0.883                         | Fear anx multi      | 0.091667                                      | 0.473067                             |
| Happy total multi   | 0.045           | 45   | 0.887                         | Fear depres multi   | 0.093750                                      | 0.473067                             |
| Sad total multi     | 0.087           | 46   | 0.934                         | Fear antisoc multi  | 0.095833                                      | 0.487304                             |
| Angry total multi   | 0.013           | 47   | 0.977                         | Sad anx             | 0.097917                                      | 0.496500                             |
| Fear total multi    | 0.844           | 48   | 0.993                         | Sad depress         | 0.100000                                      | 0.496500                             |

\* Significant after multiple test correction

## 2 Post hoc sensitivity analyses: adjusting for education level

Table S-4

*Bootstrapping results of ASR Depressive Problems, Anxiety problems, Avoidance problems, ADHD problems, Antisocial problems and Total problems regressed on facial emotion identification reaction times, **adjusted for education level***

|                                         |                     | RT Happy |                 | RT Sad   |                 | RT Angry |                 | RT Fearful |                 |
|-----------------------------------------|---------------------|----------|-----------------|----------|-----------------|----------|-----------------|------------|-----------------|
|                                         |                     | <i>B</i> | <i>p</i> -value | <i>B</i> | <i>p</i> -value | <i>B</i> | <i>p</i> -value | <i>B</i>   | <i>p</i> -value |
| <b>Single emotion models</b>            | Depressive problems | .029     | .136            | -.006    | .749            | .032     | .119            | .010       | .634            |
|                                         | Anxiety problems    | .026     | .200            | -.003    | .895            | .024     | .250            | .007       | .727            |
|                                         | Avoidance problems  | .051     | .015            | .007     | .728            | .056     | .008            | .007       | .753            |
|                                         | ADHD problems       | .033     | .118            | -.005    | .809            | .044     | .028            | .011       | .578            |
|                                         | Antisocial problems | .042     | .043            | .003     | .860            | .020     | .298            | .006       | .774            |
|                                         | Total problems      | .046     | .026            | -.001    | .953            | .048     | .020            | .011       | .607            |
| <b>Multi emotion models<sup>a</sup></b> | Depressive problems | .031     | .203            | -.041    | .123            | .045     | .093            | -.005      | .845            |
|                                         | Anxiety problems    | .028     | .254            | -.024    | .368            | .034     | .195            | -.008      | .756            |
|                                         | Avoidance problems  | .046     | .071            | -.043    | .133            | .069     | .015            | -.018      | .506            |
|                                         | ADHD problems       | .031     | .220            | -.035    | .190            | .065     | .012            | -.020      | .437            |
|                                         | Antisocial problems | .041     | .090            | -.017    | .505            | .021     | .419            | -.017      | .520            |
|                                         | Total problems      | .045     | .067            | -.044    | .112            | .065     | .018            | -.017      | .533            |

ASR = Adult Self-report, ADHD = Attention/Deficit Hyperactivity Disorder; RT = mean reaction time for correct responses in milliseconds; all variables were standardized (Z-values), therefore *B*s can be interpreted as  $\beta$ s; all effects were adjusted for gender, age and education level; all *p*-values were estimated from 10,000 bootstrap samples

**No *p*-values < multiple test correction significance thresholds**

<sup>a</sup> Multi emotion models contained all four emotion RTs

## S-References

- Benjamini, Y., Hochberg, Y., 1995. Controlling the False Discovery Rate: A practical and powerful approach to multiple testing. *Journal of the Royal Statistical Society. Series B (Methodological)* 57, 289–300.
- Cheverud, J.M., 2001. A simple correction for multiple comparisons in interval mapping genome scans. *Heredity* 87, 52–58. doi:10.1046/j.1365-2540.2001.00901.x
- Li, J., Ji, L., 2005. Adjusting multiple testing in multilocus analyses using the eigenvalues of a correlation matrix. *Heredity* 95, 221–227. doi:10.1038/sj.hdy.6800717
